# Supplementary material
Source: PubMed Central journal article supplement (PMC4102970)
Supplement: cn4001928_si_001.pdf [file cn4001928_si_001.pdf]

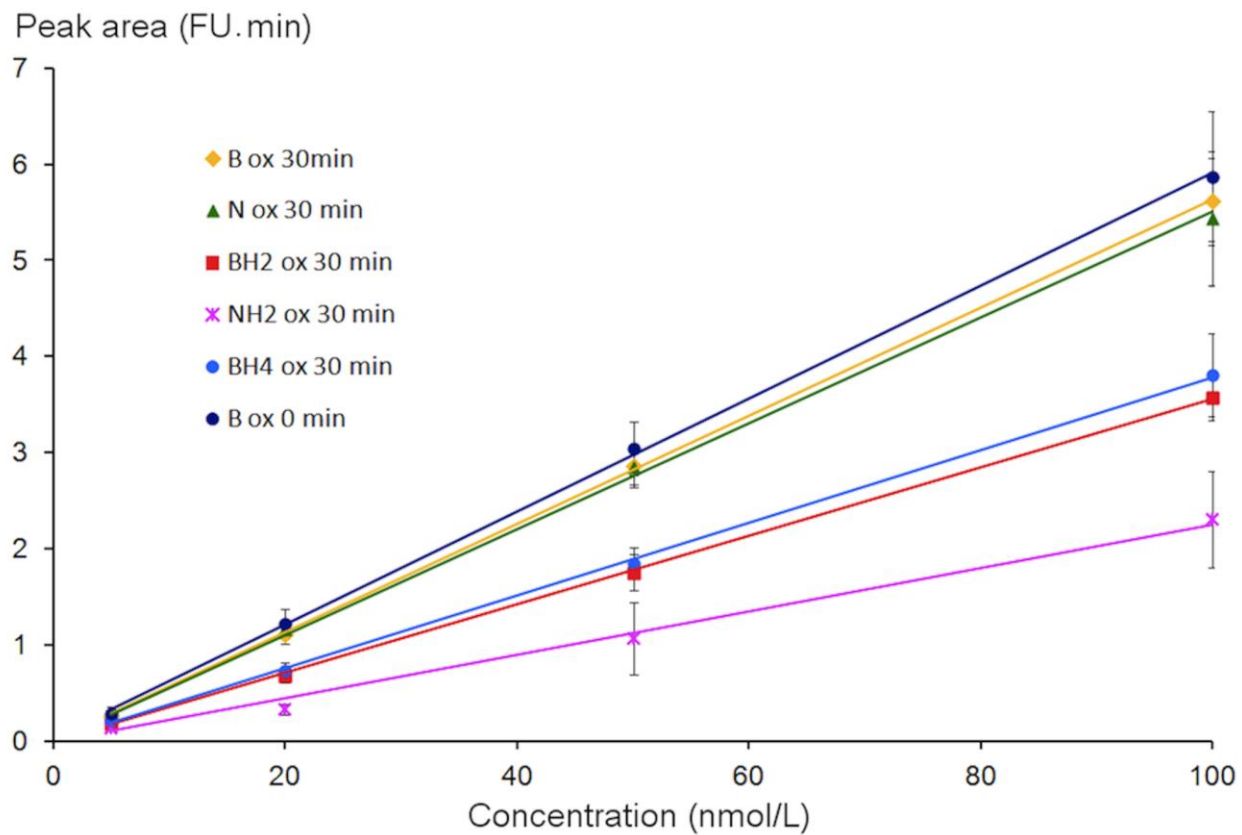

**Figure S-1:** Acidic chemical oxidation yields of B, BH<sub>2</sub>, BH<sub>4</sub>, N, and NH<sub>2</sub>, after 30 min of incubation according to ref. 29.

**Table S-1.** Analytical recovery and accuracy of the method, and within-run comparison between authentic and artificial cerebrospinal fluid (CSF) matrices.

| Analytes | Added concentration (nmol/L) | Authentic CSF                   |                          |        | Artificial CSF                  |                          |        |                                 |        | p-value ** |
|----------|------------------------------|---------------------------------|--------------------------|--------|---------------------------------|--------------------------|--------|---------------------------------|--------|------------|
|          |                              | Within-run (n = 6)              |                          |        | Within-run (n = 6)              |                          |        | Between-run (n = 10)            |        |            |
|          |                              | Measured concentration (nmol/L) | Analytical recovery (%)* | CV (%) | Measured concentration (nmol/L) | Analytical recovery (%)* | CV (%) | Measured concentration (nmol/L) | CV (%) |            |
| N        | 0                            | 2.5                             | -                        | 7.3    | -                               | -                        | -      | -                               | -      | -          |
|          | 5                            | 7.1                             | 92.0                     | 9.2    | 4.9                             | 98.0                     | 8.2    | 5.3                             | 5.9    | 0.3605     |
|          | 20                           | 20.9                            | 92.0                     | 5.1    | 19.7                            | 98.5                     | 8.1    | 21.6                            | 4.3    | 0.1280     |
|          | 50                           | 48.4                            | 91.8                     | 3.9    | 49.9                            | 99.8                     | 9.9    | 54.3                            | 5.9    | 0.0936     |
|          | 100                          | 93.3                            | 90.8                     | 6.2    | 100.1                           | 100.1                    | 9.9    | 106.7                           | 6.1    | 0.0752     |
| NH2      | 0                            | 7.5                             | -                        | 8.9    | -                               | -                        | -      | -                               | -      | -          |
|          | 5                            | 12.8                            | 106.0                    | 6.3    | 5.0                             | 100.0                    | 9.0    | 5.2                             | 7.9    | 0.2190     |
|          | 20                           | 25.9                            | 92.0                     | 9.0    | 18.9                            | 94.5                     | 7.5    | 18.6                            | 7.9    | 0.6631     |
|          | 50                           | 53.1                            | 91.2                     | 8.6    | 48.7                            | 97.4                     | 7.1    | 46.3                            | 6.4    | 0.2144     |
|          | 100                          | 103.5                           | 96.0                     | 8.5    | 100.8                           | 100.8                    | 6.2    | 91.2                            | 9.1    | 0.3015     |
| BH4      | 0                            | n.d.                            | -                        | n.d.   | -                               | -                        | -      | -                               | -      | -          |
|          | 5                            | 5.4                             | 108.0                    | 9.5    | 5.7                             | 114.0                    | 3.4    | 5.5                             | 8.1    | 0.2099     |
|          | 20                           | 19.2                            | 96.0                     | 5.1    | 19.5                            | 97.5                     | 2.5    | 21.1                            | 6.0    | 0.5169     |
|          | 50                           | 50.5                            | 101.0                    | 6.7    | 51.3                            | 102.6                    | 7.8    | 49.7                            | 9.1    | 0.7162     |
|          | 100                          | 103.5                           | 103.5                    | 8.4    | 101.5                           | 101.5                    | 6.9    | 98.1                            | 8.4    | 0.6701     |
| B        | 0                            | 25.2                            | -                        | 4.6    | -                               | -                        | -      | -                               | -      | -          |
|          | 5                            | 30.6                            | 108.0                    | 7.8    | 5.1                             | 102.0                    | 5.0    | 5.7                             | 8.4    | 0.1664     |
|          | 20                           | 44.5                            | 96.5                     | 4.7    | 19.6                            | 98.0                     | 4.7    | 20.9                            | 6.3    | 0.7544     |
|          | 50                           | 70.5                            | 90.6                     | 5.6    | 50.0                            | 100.0                    | 6.8    | 52.0                            | 8.6    | 0.0516     |
|          | 100                          | 112.6                           | 88.0                     | 8.1    | 100.0                           | 100.0                    | 6.7    | 104.0                           | 6.5    | 0.0506     |
| BH2      | 0                            | 28.7                            | -                        | 1.9    | -                               | -                        | -      | -                               | -      | -          |
|          | 5                            | 34.1                            | 108.0                    | 4.6    | 5.2                             | 104.0                    | 9.7    | 5.8                             | 8.5    | 0.4040     |
|          | 20                           | 47.9                            | 96.0                     | 6.0    | 19.5                            | 97.5                     | 8.1    | 21.4                            | 7.2    | 0.8275     |
|          | 50                           | 75.7                            | 94.0                     | 2.2    | 50.0                            | 100.0                    | 8.8    | 54.7                            | 6.1    | 0.1497     |
|          | 100                          | 122.7                           | 94.0                     | 3.4    | 100.1                           | 100.1                    | 5.5    | 108.0                           | 4.9    | 0.0558     |

\* Analytical recovery was calculated according to the formulae:  $AR (\%) = [(Final\ concentration - Initial\ concentration) / Added\ concentration] \times 100$

\*\* p-value is obtained with a two-tailed Student's t-test for comparison of mean concentrations obtained between authentic CSF and artificial CSF after checking homogeneity of variances using Fisher's test.

(n.d. = not detected).

**Table S-2.** LOD, LOQ, and linearity data with spiked artificial CSF samples.

| Analyte         | LOD* | LOQ** | Slope  | Intercept | R <sup>2</sup> | Sy/x <sup>a</sup> | Sa <sup>b</sup> | Sb <sup>c</sup> |
|-----------------|------|-------|--------|-----------|----------------|-------------------|-----------------|-----------------|
| B               | 1.2  | 3.6   | 0.1238 | -0.016    | 0.990          | 0.48              | 0.0027          | 0.154           |
| BH <sub>2</sub> | 1.8  | 5.0   | 0.0949 | -0.023    | 0.990          | 0.30              | 0.0020          | 0.097           |
| BH <sub>4</sub> | 1.7  | 5.0   | 0.0566 | 0.086     | 0.986          | 0.23              | 0.0014          | 0.074           |
| N               | 0.9  | 2.7   | 0.1263 | -0.027    | 0.981          | 0.67              | 0.0038          | 0.215           |
| NH <sub>2</sub> | 1.5  | 4.5   | 0.1097 | -0.093    | 0.991          | 0.38              | 0.0022          | 0.122           |

\* Limit of detection for a signal to noise ratio of 3. \*\* Limit of quantitation. <sup>a</sup> Standard error of the estimate. <sup>b</sup> Standard error of the slope. <sup>c</sup> Standard error of the intercept.
